# Supplementary material for: Potential wound healing activity of Quercus infectoria formulation in diabetic rats
Source: PeerJ. 2017 Jul 24;5:e3608. doi: 10.7717/peerj.3608 (PMC5527956; doi:10.7717/peerj.3608)
Supplement: Data S2 [file peerj-05-3608-s002.xlsx]

## Sheet: Standard Control
Concentration (mg/ml)	OD1	OD2	X	%inhibition	SD
control	1.234	1.245	1.2395
25	0.03	0.029	0.0295	97.62	0.000707107
20	0.031	0.03	0.0305	97.5393	0.000707107
10	0.033	0.036	0.0345	97.2166	0.00212132
5	0.036	0.036	0.036	97.0956	0
1	0.036	0.039	0.0375	96.9746	0.00212132

## Sheet: Samples
Concentration of control = 25 mg/ml --> % inhibition = 97.65
	OD1	OD2	X	%inhibition	SD
Control	0.774	0.764	0.769		0.00707107
QiF10	0.042	0.043	0.0425	94.4733	0.000707107
extract	0.021	0.019	0.02	97.3992	0.00141421
Trolox	0.017	0.019	0.018	97.6593	0.00141421

## Sheet: solution base
Sample	OD1	OD2	OD3	X	%inhibition	SD
Control	0.32	0.31	0.3	0.31		0.01
1	0.312	0.332	0.319	0.321	-3.54839	0.0101489
2	0.313	0.312	0.311	0.312	-0.645161	0.001
3	0.315	0.314	0.314	0.314333	-1.39785	0.00057735
4	0.317	0.316	0.316	0.316333	-2.04301	0.00057735
5	0.316	0.315	0.314	0.315	-1.6129	0.001
6	0.315	0.313	0.315	0.314333	-1.39785	0.0011547
7	0.316	0.316	0.317	0.316333	-2.04301	0.00057735
8	0.311	0.313	0.311	0.311667	-0.537634	0.0011547
9	0.312	0.312	0.311	0.311667	-0.537634	0.00057735
10	0.314	0.313	0.315	0.314	-1.29032	0.001
Control	0.289	0.287	0.288	0.288		0.001
11	0.29	0.291	0.29	0.290333	-0.810185	0.00057735
12	0.293	0.296	0.301	0.296667	-3.00926	0.00404145
13	0.287	0.291	0.3	0.292667	-1.62037	0.00665833
14	0.294	0.292	0.296	0.294	-2.08333	0.002
15	0.293	0.295	0.299	0.295667	-2.66204	0.00305505
16	0.289	0.291	0.301	0.293667	-1.96759	0.0064291
17	0.292	0.292	0.291	0.291667	-1.27315	0.00057735
18	0.291	0.29	0.293	0.291333	-1.15741	0.00152753
19	0.29	0.288	0.289	0.289	-0.347222	0.001
20	0.289	0.289	0.294	0.290667	-0.925926	0.00288675
