# Supplementary material for: Potential wound healing activity of Quercus infectoria formulation in diabetic rats
Source: PeerJ. 2017 Jul 24;5:e3608. doi: 10.7717/peerj.3608 (PMC5527956; doi:10.7717/peerj.3608)
Supplement: Data S4 [file peerj-05-3608-s004.xlsx]

## Sheet: Standard Control
Concentration (ug/ml)	OD1	OD2	X	SD
200	1.247	1.188	1.2175	0.0417193
150	0.935	1.036	0.9855	0.0714178
100	0.644	0.597	0.6205	0.033234
60	0.397	0.344	0.3705	0.0374767
30	0.255	0.268	0.2615	0.00919239

## Sheet: sample
ความเข้มข้น 100 µg/ml						y= 0.0059x + 0.0536				gallic acid equivalence (GAE) mg.gallic acid/g. extract
ตำรับยา	OD1	OD2	X	SD		OD1	OD2	X		OD1	OD2	X	SD
QiF10	0.394	0.398	0.396	0.00282843		57.6949	58.3729	58.0339		576.949	583.729	580.339	4.79394
extract	0.62	0.613	0.6165	0.00494975		96	94.8136	95.4068		960	948.136	954.068	8.3894
Gallic acid	0.644	0.597	0.6205	0.033234		100.068	92.1017	96.0847		1000.68	921.017	960.847	56.3288

## Sheet: solution base
						y= 0.0059x + 0.0536				gallic acid equivalence (GAE) mg.gallic acid/g. extract
ตำรับยา	OD1	OD2	OD3			OD1	OD2	OD3		OD1	OD2	OD3	X	SD
Base for QiF10	0.006	0.007	0.009			-8.0678	-7.89831	-7.55932		-80.678	-78.9831	-75.5932	-78.4181	2.58903

## Sheet: Sheet1
						Tanin	DPPH	ABTS
441.356	93.9733	76.5115				441.356	93.9733	76.5115
455.763	93.4681	80.7158				455.763	93.4681	80.7158
340.508	94.5868	84.2946				340.508	94.5868	84.2946
288.814	96.1386	74.3224				288.814	96.1386	74.3224
304.068	94.4785	75.9555				304.068	94.4785	75.9555
326.102	96.4273	77.5886				326.102	96.4273	77.5886
299.831						299.831	96.3912	56.9493
322.712	94.6951	76.5462				322.712	94.6951	76.5462
592.203	94.6229	94.3711				592.203	94.6229	94.3711
580.339	94.4785	97.2203				580.339	94.4785	97.2203
348.983	92.205	97.7762				348.983	92.205	97.7762
339.661	93.3237	96.7686				339.661	93.3237	96.7686
292.203	90.7975	68.1376				292.203	90.7975	68.1376
210	92.5659	84.0167				210	92.5659	84.0167
281.186	94.5146	89.7151				281.186	94.5146	89.7151
282.034	93.6124	87.5261				282.034	93.6124	87.5261
212.542	93.9733	72.0987				212.542	93.9733	72.0987
157.458	94.7311	98.1237				157.458	94.7311	98.1237
173.559	95.2003	77.9013				173.559	95.2003	77.9013
171.864	95.5612	91.5219				171.864	95.5612	91.5219
1079.49	97.4017	98.6101				1079.49	97.4017	98.6101
